# Supplementary material for: Development and Validation of an Immune-Related Gene-Pair Model of High-Grade Serous Ovarian Cancer After Platinum-Based Chemotherapy
Source: Front Oncol. 2021 Feb 10;10:626555. doi: 10.3389/fonc.2020.626555 (PMC7928280; doi:10.3389/fonc.2020.626555)
Supplement: Supplementary file 1 [file Table_1.xlsx]

## Sheet: S1
Supplementary Table-S1: Summary of included studies.
Study	GEO Accession number	Platform/GEO accession number	Sample size (reported)	Paper Title	Survival data	Treatment	PMID
Konecny	GSE53963	Agilent-014850 Whole Human Genome Microarray 4x44K G4112F (Probe Name version)/GPL6480	174	Prognostic and therapeutic relevance of molecular subtypes in high-grade serous ovarian cancer.	OS	Platinum based chemotherapy	25269487
Lisowska	GSE63885	Affymetrix Human Genome U133 Plus 2.0 Array/GPL570	101	Gene expression analysis in ovarian cancer - faults and hints from DNA microarray study.	OS;DFS	32 patients were treated with platinum/cyclophosphamide,while 40 patients were treated with taxane/platinum regimen.	24478986
Bonome	GSE26712	Affymetrix Human Genome U133A Array/GPL96	195	A gene signature predicting for survival in suboptimally debulked patients with ovarian cancer.	OS	Platinum	18593951
Yoshihara_1	GSE17260	Agilent-014850 Whole Human Genome Microarray 4x44K G4112F (Probe Name version)/GPL6480	110	Gene expression profile for predicting survival in advanced-stage serous ovarian cancer across two independent datasets.	OS;PFS	All patients received platinum/taxane-based chemotherapy	20300634
Yoshihara_2	GSE32062	Agilent-014850 Whole Human Genome Microarray 4x44K G4112F (Probe Name version)/GPL6480; GPL570	270	High-risk ovarian cancer based on 126-gene expression signature is uniquely characterized by downregulation of antigen presentation pathway.	OS,PFS	Platinum	22241791
Yoshihara_3	GSE32063	Agilent-014850 Whole Human Genome Microarray 4x44K G4112F (Probe Name version)/GPL6480	40	High-risk ovarian cancer based on 126-gene expression signature is uniquely characterized by downregulation of antigen presentation pathway.	OS;PFS	Platinum	22241791
Denkert	GSE14764	Affymetrix Human Genome U133A Array/GPL96	80	A prognostic gene expression index in ovarian cancer - validation across different independent data sets.	OS	Carboplatin–paclitaxel chemotherapy	19294737
Ferriss	GSE30161	Affymetrix Human Genome U133 Plus 2.0 Array/GPL570	58	Multi-gene expression predictors of single drug responses to adjuvant chemotherapy in ovarian carcinoma: predicting platinum resistance.	OS;PFS	Platinum	22348014
Tothill	GSE9891	Affymetrix Human Genome U133 Plus 2.0 Array/GPL570	285	Novel molecular subtypes of serous and endometrioid ovarian cancer linked to clinical outcome.	OS;PFS	Platinum	18698038
TCGA	—	Affymetrix Human Genome U133A Array/GPL96	587	Integrated Genomic Analyses of Ovarian Carcinoma	OS;PFS	Platinum/taxane-based chemotherapy	21720365
Abbreviations:OS:overall survival; PFS:Progression-free survival; NA- not available; GEO - Gene Expression Omnibus

## Sheet: S2
Supplementary Table-S2: Summary of filtered studies.
Dataset	GEO Accession number	Platform/GEO accession number	Sample size	Paper Title	References	PMID	Filter reason
Mok	GSE18520	Affymetrix Human Genome U133 Plus 2.0 Array/GPL570	75	A gene signature predictive for outcome in advanced ovarian cancer identifies a survival factor: microfibril-associated glycoprotein 2	Cancer Cell 2009	19962670	Not treated with platinum
Marchini	GSE8841	Agilent Human 1 cDNA Microarray (G4100A) /GPL5689	83	Analysis of gene expression in early-stage ovarian cancer	Clin Cancer Res 2008	19047114	Non-HGSOC
Spentzos	GSE31245	Affymetrix Human Genome U95 Version 2 Array/GPL8300	58	Unique gene expression profile based on pathologic response in epithelial ovarian cancer.	J Clin Oncol 2005	16204010	Non-HGSOC
Mateescu	GSE26193	Affymetrix Human Genome U133 Plus 2.0 Array/GPL570	107	miR-141 and miR-200a act on ovarian tumorigenesis by controlling oxidative stress response.	Nat Med 2011	22101765	Not treated with platinum
Bild	GSE3149	Affymetrix Human Genome U133A Array/GPL96	156	Oncogenic pathway signatures in human cancers as a guide to targeted therapies	Nature 2006	16273092	OS was not provided
Trinh	GSE28739	Agilent-012097 Human 1A Microarray (V2) G4110B/GPL7264	50	Microarray-based oncogenic pathway profiling in advanced serous papillary ovarian carcinoma	PLoS One 2011	21799864	OS was not provided
Moreno	GSE7463	Affymetrix Human Genome U95 Version 2 Array/GPL8300	43	Evidence that p53-mediated cell-cycle-arrest inhibits chemotherapeutic treatment of ovarian carcinomas.	PLoS One 2007	17505532	OS was not provided
Weroha	GSE66667	Affymetrix Human Genome U133 Plus 2.0 Array/GPL570	36	Tumorgrafts as in vivo surrogates for women with ovarian cancer.	Clin Cancer Res 2014	24398046	OS was not provided
Veskimäe	GSE114206	Agilent-026652 Whole Human Genome Microarray 4x44K v2/GPL13497	12	Expression Analysis of Platinum Sensitive and Resistant Epithelial Ovarian Cancer Patient Samples Reveals New Candidates for Targeted Therapies.	Transl Oncol 2018 Oct;11(5):1160-1170.	30056367	OS was not provided
Huang	GSE112798	Affymetrix Human Genome U133 Plus 2.0 Array/GPL570	31	Machine learning predicts individual cancer patient responses to therapeutic drugs with high accuracy	Sci Rep 2018 Nov 6;8(1):16444.	30401894	OS was not provided
Way	GSE74357	Agilent-014850 Whole Human Genome Microarray 4x44K G4112F/GPL6480	529	Comprehensive Cross-Population Analysis of High-Grade Serous Ovarian Cancer Supports No More Than Three Subtypes.	G3 (Bethesda) 2016 Dec 7;6(12):4097-4103.	27729437	OS was not provided
Yeung	GSE115635	Affymetrix Human Genome U133 Plus 2.0 Array/GPL570	96	Systematic Identification of Druggable Epithelial-Stromal Crosstalk Signaling Networks in Ovarian Cancer.	J Natl Cancer Inst 2019 Mar 1;111(3):272-282.	29860390	OS was not provided
Fang	GSE102118	Illumina HiSeq 2000/GPL11154	92	Genomic and Epigenomic Signatures in Ovarian Cancer Associated with Resensitization to Platinum Drugs.	Cancer Res 2018 Feb 1;78(3):631-644.	29229600	OS was not provided
Koti	GSE51373	Affymetrix Human Genome U133 Plus 2.0 Array/GPL570	28	Identification of the IGF1/PI3K/NF κB/ERK gene signalling networks associated with chemotherapy resistance and treatment response in high-grade serous epithelial ovarian cancer.	BMC Cancer 2013	24237932	OS was not provided
Marchion	GSE23554	Affymetrix Human Genome U133A Array/GPL96	28	BAD phosphorylation determines ovarian cancer chemosensitivity and patient survival.	Clin Cancer Res 2011	21849418	Non-HGSOC
Crijns	GSE13876	Operon human v3 ~35K 70-mer two-color oligonucleotide microarrays./GPL7759	415	Survival-related profile, pathways, and transcription factors in ovarian cancer.	PLoS Med. 2009	19192944	Gene numbers too less
Pils	GSE49997	ABI Human Genome Survey Microarray Version 2/GPL2986	204	Validating the impact of a molecular subtype in ovarian cancer on outcomes: a study of the OVCAD Consortium.	Cancer Sci. 2012	22497737	Gene numbers too less
Karlan	GSE51088	Agilent-012097 Human 1A Microarray (V2) G4110B (Probe Name version)/GPL7264	172	POSTN/TGFBI-associated stromal signature predicts poor prognosis in serous epithelial ovarian cancer	Gynecol Oncol. 2014	24368280	The gene expression value is not suitable for the construction of gene pairs.

## Sheet: S3
Supplementary Table-S3: Distributions of clinical characteristics
Study	Konecny		Lisowska		Bonome		Yoshihara_1		Denkert		Ferriss		Tothill		Yoshihara_3		Yoshihara_2		TCGA
GEO accession number	GSE53963		GSE63885		GSE26712		GSE17260		GSE14764		GSE30161		GSE9891		GSE32063		GSE32062		—		Total
Sample size	174		70		185		84		66		44		240		40		260		363		1526
	No.	%	No.	%	No.	%	No.	%	No.	%	No.	%	No.	%	No.	%	No.	%			No.	%
Age
<50 years	22	12.6437	_	_	_	_	_	_	_	_	6	13.6364	33	14					78	21	139	9
≥50 years	152	87.3563	_	_	_	_	_	_	_	_	38	86.3636	207	86					285	79	682	45
Missing			70	100	185	100	84	100	66	100					40	100	260	100			705	46
Grade
2	4	2.29885	9	12.8571			41	49	22	33	17	38.6364	87	36	23	57.5	131	50.3846	42	12	376	25
3	90	51.7241	46	65.7143	185	100	43	51	44	67	27	61.3636	153	64	17	42.5	129	49.6154	320	88	1054	69
4	80	45.977	15	21.4286															1	0	96	6
Unknown	_	_	_	_	_	_	_	_	_	_	_	_	_	_
FIGO stage
1									2	3			16	7					1	0	19	1
2	8	4.5977	2	2.85714	_	_	70	83	1	2			9	4					21	6	111	7
3	125	71.8391	59	84.2857	_	_	14	17	62	94	40	90.9091	194	81	31	77.5	204	78.4615	286	79	1015	67
4	41	23.5632	9	12.8571	_	_			1	1	4	9.09091	21	9	9	22.5	56	21.5385	53	15	194	13
Unknown	_	_	_	_	185	100	_	_											2	1	187	12

## Sheet: S4
IRGPI prognostic model coef
IRGP	coef
SST|IL15RA	-0.325789
IL6R|CD86	-0.233738
PTN|PI3	-0.210684
CCL18|PTGER2	-0.184727
ISG20|ADM	-0.180282
LCK|CX3CR1	-0.176661
CXCL11|IGF1R	-0.154332
CXCL11|TNFRSF1B	-0.153537
CXCL11|FGF18	-0.148003
MMP12|CX3CR1	-0.139898
TAPBPL|PI3	-0.127785
SST|PI3	-0.0735154
GBP2|ITGB2	-0.0725137
CCL19|NOX4	-0.0722252
XCL1|OGN	-0.0699807
CXCL13|PAEP	-0.0515903
CRABP1|PI3	-0.0418521
CXCL13|CCL11	-0.0372695
CXCR4|FOS	-0.0287383
HLA-F|S100A2	-0.0200103
CXCL13|BTK	-0.0187268
CXCL13|ERAP2	-0.0150149
IDO1|SDC1	-0.00892359
CXCL14|CXCL13	0.00278941
NR3C1|CCL8	0.0054909
NPR1|HLA-DMA	0.0160193
PI3|SEMA3F	0.0328077
PDGFRB|IDO1	0.040057
SDC1|CXCL9	0.0479344
MX2|IDO1	0.0569484
OAS1|CXCL9	0.0747985
PDGFRL|LYN	0.084434
HSPA2|VAV3	0.122253
FCGR2B|MICB	0.122632
PI3|LYN	0.178836

## Sheet: S5
Pathway and Process Enrichment Analysis(gene pair)
GO	Category	Description	Count	%	Log10(P)	Log10(q)
GO:0060326	GO Biological Processes	cell chemotaxis	18	34.62	-21.03	-16.71
GO:0019221	GO Biological Processes	cytokine-mediated signaling pathway	23	44.23	-20.15	-16.13
GO:0030335	GO Biological Processes	positive regulation of cell migration	16	30.77	-13.63	-10.42
GO:0002237	GO Biological Processes	response to molecule of bacterial origin	12	23.08	-10.99	-8.09
GO:0070663	GO Biological Processes	regulation of leukocyte proliferation	10	19.23	-10.36	-7.53
GO:0009615	GO Biological Processes	response to virus	11	21.15	-10	-7.24
GO:0030155	GO Biological Processes	regulation of cell adhesion	13	25	-8.62	-6.05
R-HSA-449147	Reactome Gene Sets	Signaling by Interleukins	11	21.15	-8.53	-5.98
GO:0002697	GO Biological Processes	regulation of immune effector process	11	21.15	-8.48	-5.95
GO:0051897	GO Biological Processes	positive regulation of protein kinase B signaling	8	15.38	-8.42	-5.9
GO:1901342	GO Biological Processes	regulation of vasculature development	10	19.23	-7.63	-5.22
GO:0006816	GO Biological Processes	calcium ion transport	10	19.23	-7.52	-5.13
GO:0002822	GO Biological Processes	regulation of adaptive immune response based on somatic recombination of immune receptors built from	7	13.46	-7.51	-5.13
GO:0010942	GO Biological Processes	positive regulation of cell death	12	23.08	-7.43	-5.06
GO:0043552	GO Biological Processes	positive regulation of phosphatidylinositol 3-kinase activity	4	7.69	-6.14	-3.94
GO:0009266	GO Biological Processes	response to temperature stimulus	7	13.46	-6.07	-3.87
GO:0018108	GO Biological Processes	peptidyl-tyrosine phosphorylation	8	15.38	-5.95	-3.76
hsa05166	KEGG Pathway	HTLV-I infection	7	13.46	-5.93	-3.76
GO:0071363	GO Biological Processes	cellular response to growth factor stimulus	10	19.23	-5.69	-3.53
hsa04672	KEGG Pathway	Intestinal immune network for IgA production	4	7.69	-5.44	-3.32
Top 20 clusters with their representative enriched terms (one per cluster). "Count" is the number of genes in the user-provided lists with membership in the given ontology term. "%" is the percentage of all of the user-provided genes that are found in the given ontology term (only input genes with at least one ontology term annotation are included in the calculation). "Log10(P)" is the p-value in…
